# Supplementary material for: Prospective Water Balance Scenarios (2015–2035) for the Management of São Francisco River Basin, Eastern Brazil
Source: MDPI journal article supplement (doi:10.3390/w14152283), 2022-07-22

## Supplementary Material:

SM S1 – Comparison of the recorded and simulated flows at various cross sections of the São Francisco River. Recorded streamflow data for the model validation the model were obtained from ANA monitoring database (HIDROWEB) and from the National Electricity System Operator (ONS).

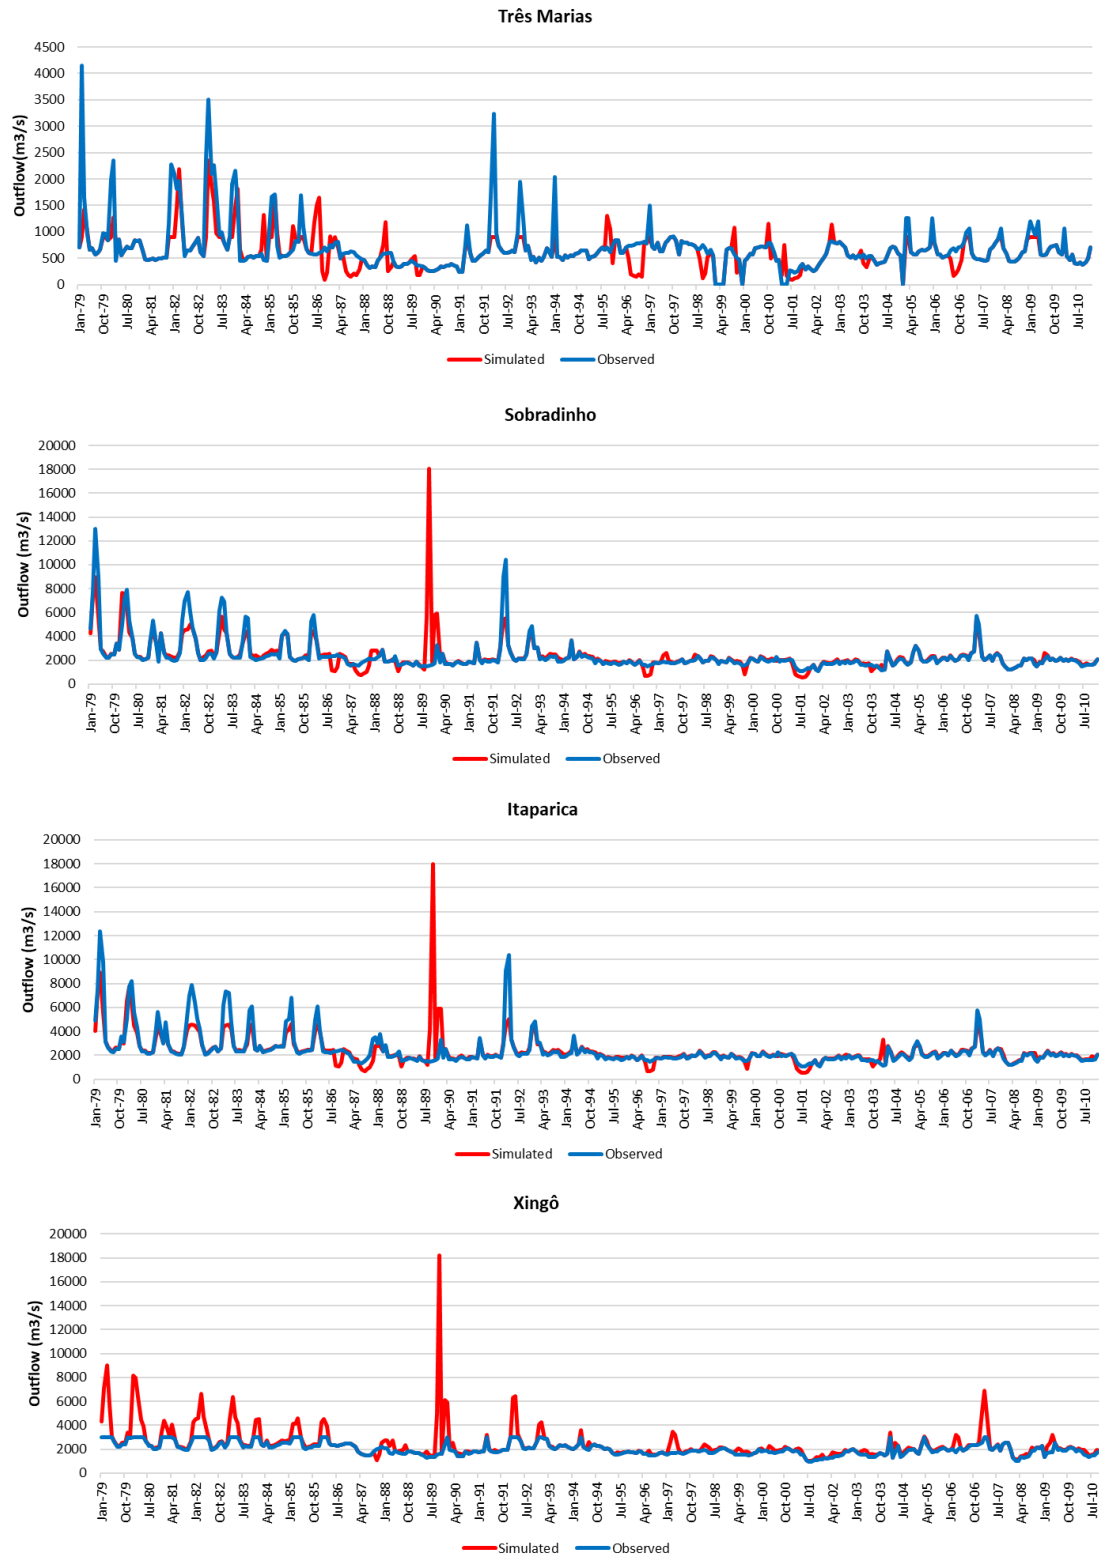

SM S2 – Synthesis of the surface water balance (demand/ availability ratio)

|                                                       | Balance situation |               |               |               |               |               |               |
|-------------------------------------------------------|-------------------|---------------|---------------|---------------|---------------|---------------|---------------|
|                                                       | Present           | A2025         | B2025         | C2025         | A2035         | B2035         | C2035         |
| Mineiro do Alto SF affluents                          | Comfortable       | Comfortable   | Comfortable   | Comfortable   | Comfortable   | Worrisome     | Worrisome     |
| Pará River                                            | Worrisome         | Worrisome     | Worrisome     | Worrisome     | Worrisome     | Worrisome     | Critical      |
| Paraopeba River                                       | Critical          | Critical      | Critical      | Critical      | Critical      | Critical      | Critical      |
| Surrounding of the Três Marias Reservoir              | Very critical     | Very critical | Very critical | Very critical | Very critical | Very critical | Very critical |
| Ribeirão dos Tiros                                    | Critical          | Critical      | Critical      | Critical      | Very critical | Very critical | Very critical |
| Das Velhas River                                      | Critical          | Critical      | Critical      | Very critical | Very critical | Very critical | Very critical |
| Rio de Janeiro and Formoso                            | Critical          | Critical      | Very critical | Very critical | Very critical | Very critical | Very critical |
| Jequitaí River                                        | Comfortable       | Worrisome     | Worrisome     | Worrisome     | Worrisome     | Critical      | Critical      |
| High Preto River                                      | Very critical     | Very critical | Very critical | Very critical | Very critical | Very critical | Very critical |
| Paracatu River                                        | Critical          | Very critical | Very critical | Very critical | Very critical | Very critical | Very critical |
| Pacuí River                                           | Comfortable       | Worrisome     | Worrisome     | Worrisome     | Worrisome     | Worrisome     | Worrisome     |
| Urucuia River                                         | Critical          | Critical      | Critical      | Critical      | Critical      | Very critical | Very critical |
| Verde Grande River                                    | Very critical     | Very critical | Very critical | Very critical | Very critical | Very critical | Very critical |
| Pandeiros, Pardo and Manga Rivers                     | Critical          | Critical      | Critical      | Very critical | Critical      | Very critical | Very critical |
| Carinhanha River                                      | Excellent         | Excellent     | Excellent     | Excellent     | Excellent     | Comfortable   | Comfortable   |
| Corrente River                                        | Comfortable       | Worrisome     | Worrisome     | Worrisome     | Worrisome     | Worrisome     | Worrisome     |
| High Grande River                                     | Critical          | Critical      | Very critical | Very critical | Critical      | Very critical | Very critical |
| Medium and low Grande River                           | Comfortable       | Worrisome     | Critical      | Critical      | Critical      | Very critical | Very critical |
| Paramirim, Santo Onofre and Carnaíba de Dentro Rivers | Very critical     | Critical      | Critical      | Critical      | Critical      | Critical      | Critical      |
| Verde and Jacaré Rivers                               | Very critical     | Very critical | Very critical | Very critical | Critical      | Very critical | Very critical |

[illegible]

SM S3 – Synthesis of the surface water balance (ACQUANET) – domestic urban and rural supply (remaining sub-basins)

[illegible]

[illegible]

SM S4 – Synthesis of the surface water balance (ACQUANET) – industry (remaining sub-basins)

[illegible]

[illegible]

SM S5 – Synthesis of the surface water balance (ACQUANET) – farming (remaining sub-basins)

[illegible]

| Sub-basin                    | Balance situation |               |               |               |               |               |               |
|------------------------------|-------------------|---------------|---------------|---------------|---------------|---------------|---------------|
|                              | Current           | A2025         | B2025         | C2025         | A2035         | B2035         | C2035         |
| Salitre River                | Critical          | Excellent     | Confortable   | Worrisome     | Excellent     | Excellent     | Excellent     |
| Brígida River                | Excellent         | Excellent     | Excellent     | Excellent     | Excellent     | Excellent     | Critical      |
| Terra Nova River             | Excellent         | Excellent     | Excellent     | Excellent     | Excellent     | Excellent     | Very Critical |
| Macururé River               | Very Critical     | Critical      | Very Critical | Worrisome     | Confortable   | Critical      | Critical      |
| Pajeú River                  | Excellent         | Excellent     | Excellent     | Excellent     | Excellent     | Excellent     | Very Critical |
| Moxotó River                 | Excellent         | Excellent     | Excellent     | Excellent     | Excellent     | Excellent     | Very Critical |
| Curituba River               | Very Critical     | Very Critical | Very Critical | Very Critical | Very Critical | Very Critical | Very Critical |
| Seco/Talhado Stream          | Excellent         | Excellent     | Excellent     | Excellent     | Excellent     | Excellent     | Excellent     |
| Low São Francisco in Sergipe | Worrisome         | Very Critical |

SM S6 – Renewable groundwater reserve values, per aquifer system, resulting from the harmonization of the groundwater balance, obtained from the current state of hydrologic knowledge of aquifers and from the integrated analysis of surface and groundwater flow

| Type     | Aquifer                                          | Area<br>(km <sup>2</sup> ) | Pmed<br>(mm) | Recharge<br>rate | Recharge<br>(m <sup>3</sup> /year) | Recharge<br>(m <sup>3</sup> /s) | Exploitable<br>reserves<br>(m <sup>3</sup> /s)* |
|----------|--------------------------------------------------|----------------------------|--------------|------------------|------------------------------------|---------------------------------|-------------------------------------------------|
| Karst    | Marancó complex, carbonate unit                  | 13                         | 586          | 10.0%            | 762775                             | 0.0242                          | 0,005                                           |
|          | Santa Filomena complex, carbonate unit           | 02                         | 603          | 10.0%            | 13374                              | 0.0004                          | 0,0001                                          |
|          | Barra Bonita formation, carbonate unit           | 40                         | 622          | 10.0%            | 2481057                            | 0.0787                          | 0,016                                           |
|          | Caatinga formation                               | 6030.8                     | 672          | 10.0%            | 415600813                          | 13.1786                         | 2,636                                           |
|          | Gandarela formation                              | 74                         | 1390         | 10.0%            | 10174779                           | 0.3226                          | 0,065                                           |
|          | Olhos D'água formation                           | 10                         | 586          | 10.0%            | 585350                             | 0.0186                          | 0,004                                           |
|          | Salitre formation                                | 14950.9                    | 692          | 10.0%            | 1024552124                         | 32.4883                         | 6,498                                           |
|          | Santana formation                                | 788                        | 675          | 10.0%            | 50846017                           | 1.6123                          | 0,322                                           |
|          | BambuÍ group, carbonate unit                     | 30426                      | 1170         | 10.0%            | 3316942597                         | 105.1796                        | 21,036                                          |
|          | Estância group, carbonate unit                   | 853                        | 630          | 15.0%            | 79323996                           | 2.5153                          | 0,503                                           |
| Granular | Alluvial deposit                                 | 18283.4                    | 943          | 23.5%            | 4045838163                         | 128.2927                        | 25,659                                          |
|          | Wind deposit                                     | 8703                       | 722          | 15.0%            | 902273461                          | 28.6109                         | 5,722                                           |
|          | Coastal deposit                                  | 536                        | 1004         | 20.0%            | 107231678                          | 3.4003                          | 0,680                                           |
|          | Alliance formation                               | 1358                       | 723          | 3.0%             | 30039981                           | 0.9526                          | 0,191                                           |
|          | Barreiras formation                              | 2104                       | 1017         | 25.0%            | 519337692                          | 16.4681                         | 3,294                                           |
|          | Brejo Santo formation                            | 90                         | 667          | 5.0%             | 2998051                            | 0.0951                          | 0,019                                           |
|          | Cabeças formation                                | 232                        | 691          | 3.0%             | 4807729                            | 0.1525                          | 0,030                                           |
|          | Candeias formation                               | 280                        | 682          | 10.0%            | 19573425                           | 0.6207                          | 0,124                                           |
|          | Candeias Formation/ Indiscriminate Islands Group | 1084                       | 772          | 10.0%            | 88264923                           | 2.7989                          | 0,560                                           |
|          | Curituba formation                               | 59                         | 827          | 1.0%             | 413113                             | 0.0131                          | 0,003                                           |
|          | Formação Exu formation                           | 2796                       | 753          | 30%              | 54279959                           | 1.7212                          | 0,344                                           |

| Type      | Aquifer                                        | Area<br>(km <sup>2</sup> ) | Pmed<br>(mm) | Recharge<br>rate | Recharge<br>(m <sup>3</sup> /year) | Recharge<br>(m <sup>3</sup> /s) | Exploitable<br>reserves<br>(m <sup>3</sup> /s)* |
|-----------|------------------------------------------------|----------------------------|--------------|------------------|------------------------------------|---------------------------------|-------------------------------------------------|
|           | Inajá formation                                | 707                        | 741          | 10.0%            | 55,335,405                         | 1.7547                          | 0,351                                           |
|           | Marizal formation                              | 57,042                     | 662          | 10.0%            | 367,100,493                        | 11.6407                         | 2,328                                           |
|           | Mauriti formation                              | 832                        | 713          | 5.0%             | 33,807,892                         | 1.0720                          | 0,214                                           |
|           | Missão Velha formation                         | 8.6                        | 849          | 5.0%             | 367,326                            | 0.0116                          | 0,002                                           |
|           | Penedo formation                               | 126                        | 1,030        | 10.0%            | 13,060,090                         | 0.4141                          | 0,083                                           |
|           | Pimenteiras formation                          | 198                        | 691          | 1.0%             | 1,370,044                          | 0.0434                          | 0,009                                           |
|           | Riachuelo formation                            | 18                         | 1,069        | 10.0%            | 1,950,814                          | 0.0619                          | 0,012                                           |
|           | Santa Brígida formation                        | 311                        | 707          | 1.0%             | 2,197,019                          | 0.0697                          | 0,014                                           |
|           | São Sebastião formation                        | 355                        | 733          | 15.0%            | 44,809,239                         | 1.4209                          | 0,284                                           |
|           | Sergi formation                                | 111                        | 693          | 1.0%             | 773,384                            | 0.0245                          | 0,005                                           |
|           | Serraria formation                             | 57                         | 971          | 10.0%            | 5,742,482                          | 0.1821                          | 0,036                                           |
|           | Tacaratu formation                             | 2,998                      | 755          | 15.0%            | 346,861,903                        | 10.9989                         | 2,200                                           |
|           | Brotas group                                   | 6                          | 707          | 1.0%             | 41,540                             | 0.0013                          | 0,0003                                          |
|           | Coruripe group                                 | 268                        | 1,004        | 10.0%            | 27,103,415                         | 0.8594                          | 0,172                                           |
|           | Igreja Nova Group - Perucaba<br>Indiscriminate | 230                        | 971          | 10.0%            | 22,112,657                         | 0.7012                          | 0,140                                           |
|           | Areado group                                   | 12,702                     | 1,313        | 20.0%            | 3,469,706,742                      | 110.0237                        | 22,005                                          |
|           | Ilhas group                                    | 114                        | 678          | 10.0%            | 7,659,669                          | 0.2429                          | 0,049                                           |
|           | Serra Grande group                             | 63.7                       | 691          | 12.0%            | 5,281,186                          | 0.1675                          | 0,033                                           |
|           | Urucuia group                                  | 101,766                    | 1137         | 20.0%            | 23,362,578,332                     | 740.8225                        | 148,164                                         |
| Fractured | Undifferentiated Fractured<br>Basement         | 256,114                    | 873          | 4.5%             | 9,919,415,924                      | 314.5426                        | 62,909                                          |
|           | BambuÍ group, land unit                        | 16,0254                    | 1,130        | 4.5%             | 8,998,559,696                      | 285.3425                        | 57,068                                          |
|           | Mata do Corda group                            | 3,693                      | 1,354        | 4.5%             | 227,046,137                        | 7.1996                          | 1,440                                           |
|           | Paranoá group, land unit                       | 872                        | 1,410        | 4.5%             | 55,021,688                         | 1.7447                          | 0,349                                           |
| Total     |                                                | 636.218,4                  |              |                  | <b>57,644,244,131</b>              | <b>1827.9</b>                   | 365.6                                           |

Note: \* 20% of the renewable reserves.

SM S7 – Water balance for domestic urban and rural supply (DUR) in São Francisco River Basin – State divides, physiographic regions, sub-basins considered in the São Francisco River Basin Ten-year Plan (2004 - 2013), current situation and future scenarios/year: a) - Current, b) – A2025, c) – B2025, d) – C2025, e) – A2035, f) – B20235, g) – C2035.

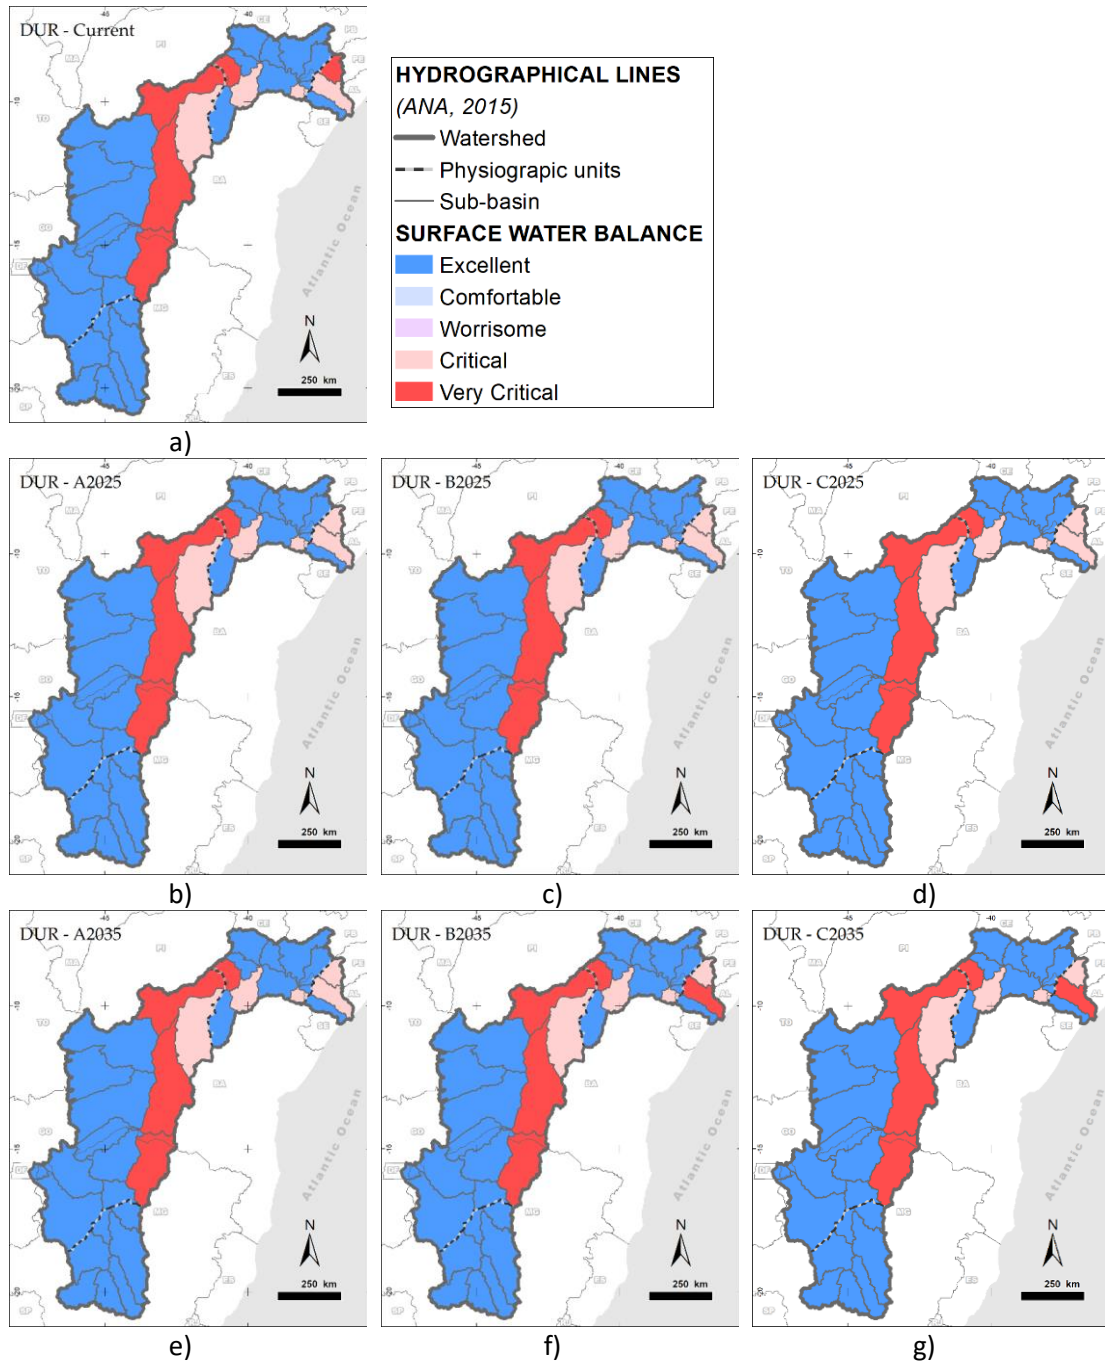

SM S8 – Water balance for industry (I) in São Francisco River Basin – State divides, physiographic regions, sub-basins considered in the São Francisco River Basin Ten-year Plan (2004 - 2013), current situation and future scenarios/year: a) - Current, b) – A2025, c) – B2025, d) – C2025, e) – A2035, f) – B2035, g) – C2035.

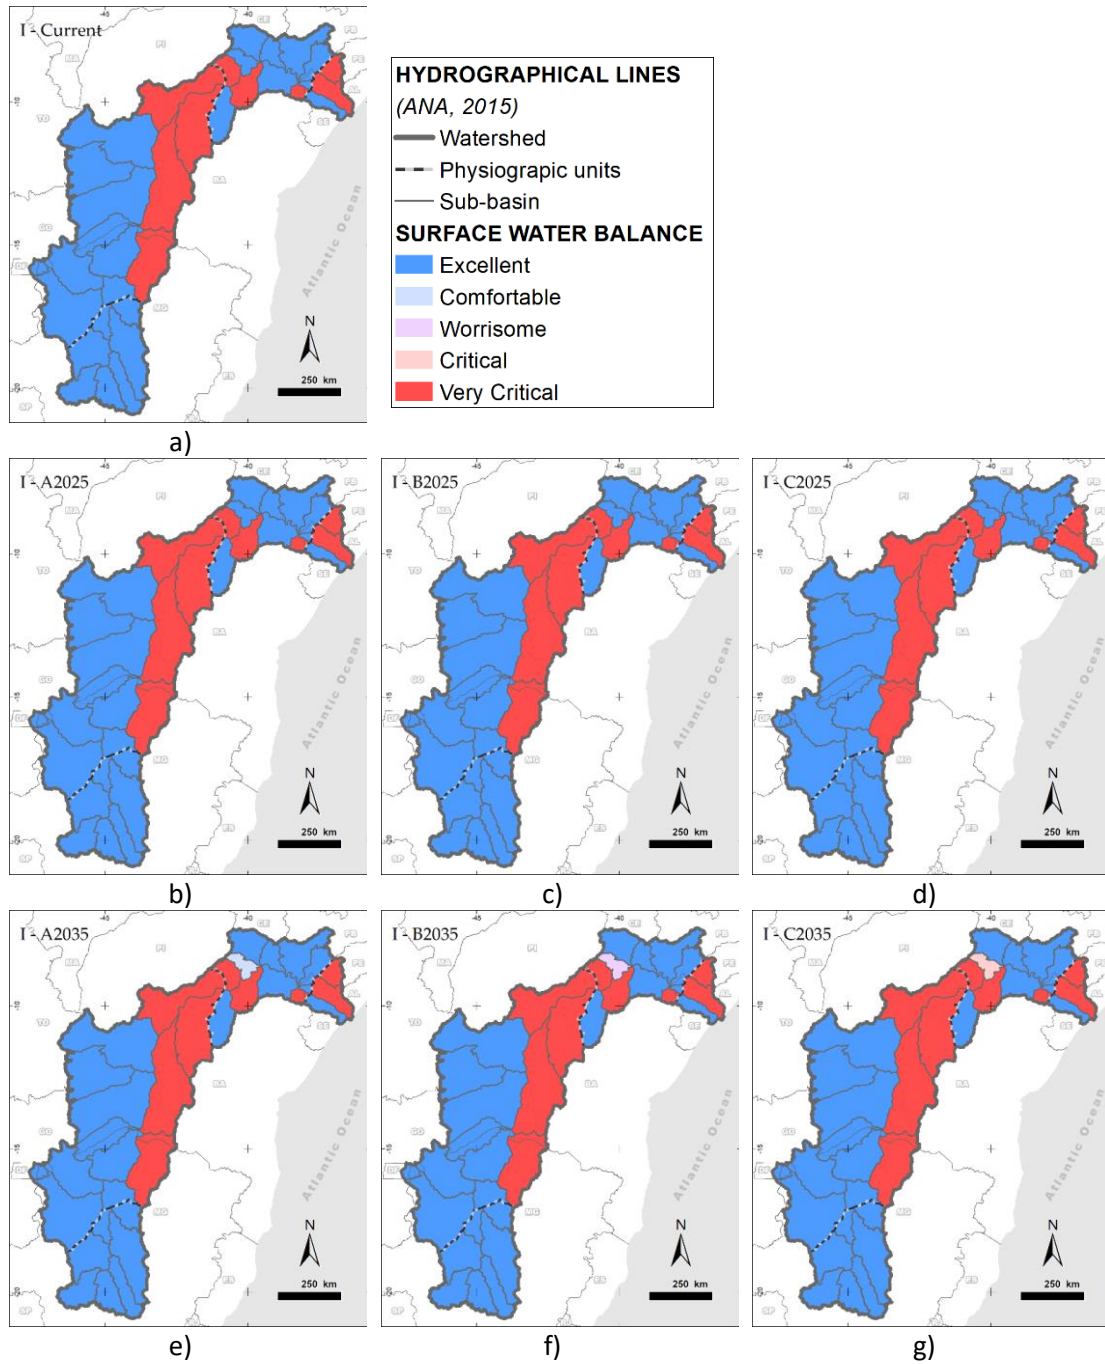

SM S9 – Water balance for farming (F, mainly irrigation) in São Francisco River Basin – State divides, physiographic regions, sub-basins considered in the São Francisco River Basin Ten-year Plan (2004 - 2013), current situation and future scenarios/year: a) - Current, b) – A2025, c) – B2025, d) – C2025, e) – A2035, f) – B20235, g) – C2035.

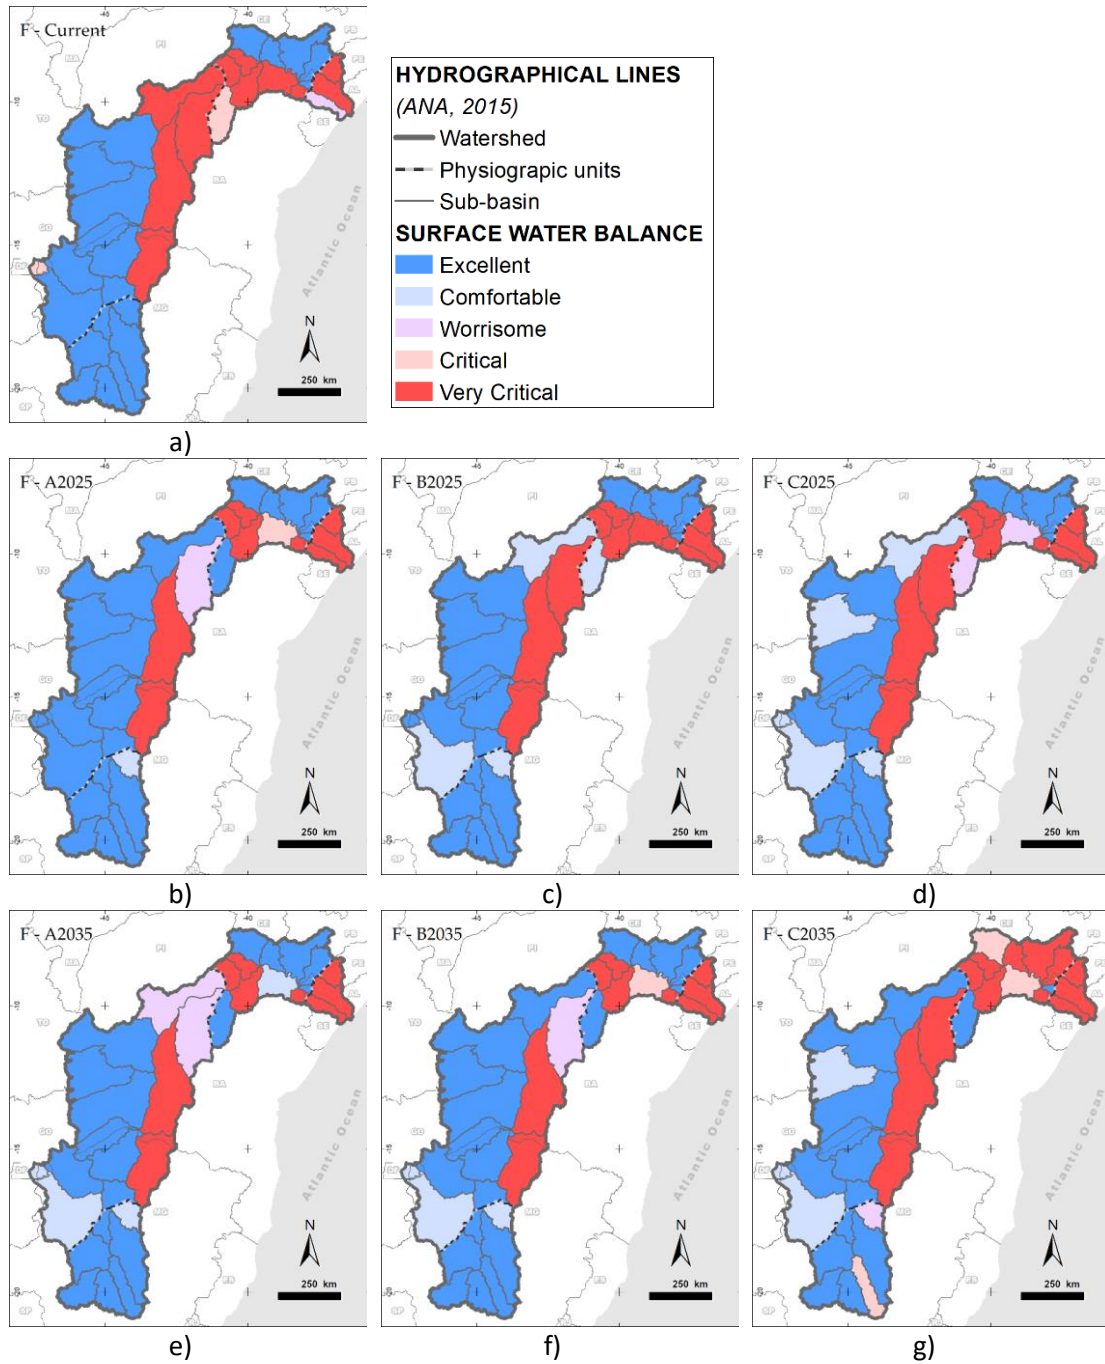

Supplement: s1 [file s1 › water-1763682-supplementary.pdf]
