# Supplementary material for: Prospective Water Balance Scenarios (2015–2035) for the Management of São Francisco River Basin, Eastern Brazil
Source: MDPI journal article supplement (doi:10.3390/w14152283), 2022-07-22
Supplement: s1 [file s1]

Archive with 1 entries (1 files):
- water-1763682-supplementary.pdf
